# Supplementary material for: Reovirus FAST Protein Enhances Vesicular Stomatitis Virus Oncolytic Virotherapy in Primary and Metastatic Tumor Models
Source: PubMed Central journal article supplement — Mol Ther Oncolytics. 2017 Aug 4;6:80–9. doi: 10.1016/j.omto.2017.08.001 (PMC5562180; doi:10.1016/j.omto.2017.08.001), 2017-08-04
Supplement: mmc1.pdf [file mmc1.pdf]

**OMTO, Volume 6**

**Supplemental Information**

**Reovirus FAST Protein Enhances Vesicular  
Stomatitis Virus Oncolytic Virotherapy in  
Primary and Metastatic Tumor Models**

**Fabrice Le Boeuf, Simon Gebremeskel, Nichole McMullen, Han He, Anna L. Greenshields, David W. Hoskin, John C. Bell, Brent Johnston, Chungeng Pan, and Roy Duncan**

## Supplementary Figures

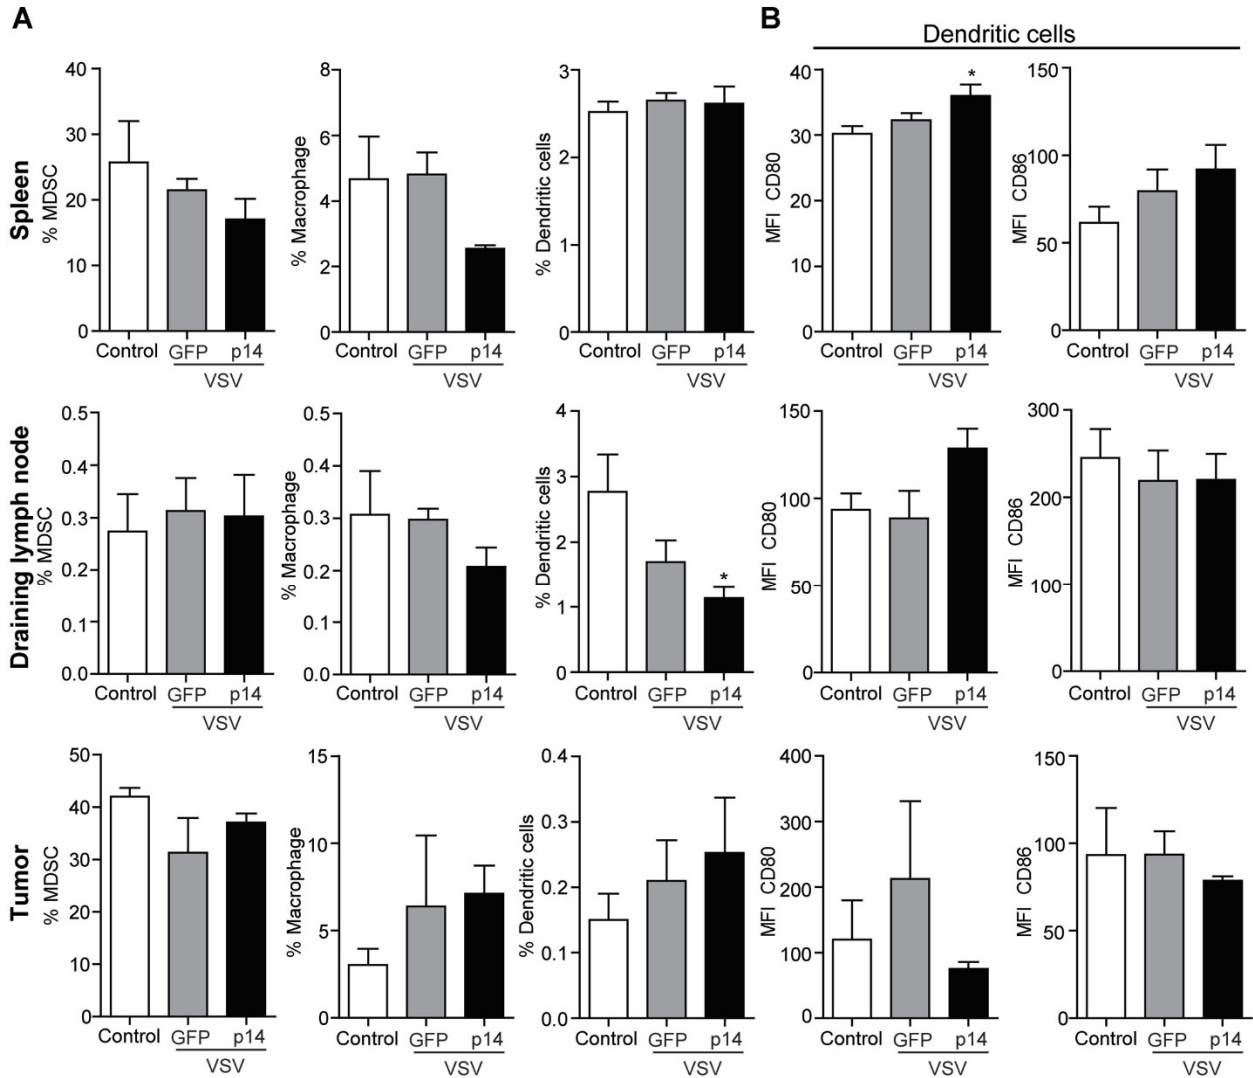

**Supplemental Figure S1**

**Supplemental Figure S1. Myeloid populations in tumor bearing mice receiving VSV-p14 treatment.** (A) The frequency of MDSC ( $\text{Gr1}^+ \text{CD11b}^+$ ), macrophages ( $\text{F4/80}^+ \text{CD11b}^+$ ) and dendritic cells ( $\text{CD11c}^{\text{hi}} \text{CD49b}^-$ ) was examined in the spleen, tumor and draining lymph node by flow cytometry ( $n= 3-7$  per treatment group). (B) The expression of CD80 and CD86 on dendritic cells was also examined. 4T1 tumor-bearing mice were treated with PBS, VSV-GFP or VSV-p14. Spleen cells, tumor and draining lymph node were isolated and stained 24h following last treatment. \* $p < 0.05$  compared to control.
